# Supplementary material
Source: publisher site journal article supplement (https://www.dovepress.com/article/464910)
Supplement: Supplementary file 1 [file get_supplementary_file.php]

**Table S1 Drugs used in the management of endometriosis.**

| **Drug** | **Mechanisms of action** | **Side effects** |
| --- | --- | --- |
| NSAIDs | Inhibit the synthesis of prostaglandins | Gastrointestinal reactions, headache, drowsiness, dizziness, dry mouth, gastric ulcers |
| Oral contraceptives | Inhibit ovarian function | Bleeding/spotting, irregular vaginal bleeding, thrombosis |
| Progesterone | Inhibits pituitary gonadotropin secretion, causes an acyclic hypoestrogenic state, causes high progesterone amenorrhea, and decidual transformation of endometrium | Mild depression, water and sodium retention, weight gain, irregular spotting of vaginal bleeding |
| SPRM | Inhibit ovulation, inhibit the proliferation of the endometrium | Headache, dizziness, nausea, abdominal pain, heavy menstrual bleeding, liver function damage |
| Danazol | Inhibits pituitary gonadotropin secretion, suppresses ovarian steroid hormone production | Amenorrhea, hirsutism, weight gain, dyslipidemia |
| GnRH-a | Inhibit pituitary gonadotropin levels, decrease ovarian steroid hormone production | Hot flashes, vaginal dryness, hyposexuality, bone loss, amenorrhea |
| Aromatase inhibitors | Block the enzymatic activity of aromatase, reduce the synthesis of estrogen | Vaginal dryness, hot flushes, headache, bone loss, bone/joint/muscle pain |
| GnRH antagonists | Inhibit pituitary gonadotropin levels, decrease ovarian steroid hormone production | Hot flashes, bone loss, dyslipidemia, irregular menstruation |

**Table S2 Classification of surgical methods.**

| **Classification** | **Main points** |
| --- | --- |
| Fertility preserving surgery | Preserve the uterus, preserve one or both ovaries, preserve at least part of the ovarian tissue; remove or destroy all macroscopic ectopic endometrial lesions; separate adhesions, restore normal anatomical structures |
| Ovarian function preserving surgery | Remove the endometriotic lesion and uterus; preserve at least one or part of the ovary |
| Radical operation | Remove all endometriotic lesions, uterus, bilateral ovaries and fallopian tubes |

**Table S3 Main ingredients of multiple component prescriptions against endometriosis.**

| **Prescription** | **Main ingredients** | **Ref** |
| --- | --- | --- |
| Cai’s Neiyi Prescription (CNYP) | China root Greenbrier Rhizome 12g, Cassia Twig 3g, Leech 6g, Radix Paeoniae Rubra 10g, Rhizoma Curcumae 10g, Chinese Sage Herb 20g, Cortex Moutan 10g, Spina Gleditsiae 30g, Peach Seed 10g | 1, 2 |
| Danefukang Jiangao (DEFK) | Radix Salviae Miltiorrhizae, Rhizoma Curcumae, Sanleng, Rhizoma Cyperi, Rhizoma Corydalis | 3 |
| Guizhi fuling decoction (GZFLD) | Cinnamon cortex (Cinnamomum cassia Presl) 9g, Poria cocos (Poria cocos (Schw.) Wolf) 9g, Moutan cortex (Paeonia suffruticosa Andr.) 9g, Paeoniae Radix (Paeonia lactiflora Pall.) 9g, Persicae semen (Prunus persica (L.) Batsch) 9g, | 4, 5 |
| Huangzhi Neiyi capsule (HZNYC) | Cooked rhubarb 9g, Leech 3g and Cyperus rotundus 6g | 6 |
| NeiyiKangfu Tablet (NYKFT) | Bichihua, Sanguoteng, cooked rhubarb, peach kernel, three prune, coix seed, soil turtle worm, turtle | 7 |
| Neiyi Prescription of QIU (NYPQ) | Baristellia 15g, honeysuckle vine 15g, red vine 15g, prunella japonicus 15g, hedyotis vulgaris 10g, white hair vine 10g, corydalis yanhusuo 15g, purple salvia miltiorrhiza 20g, willebrand 15g, barley malt 30g, fried Hawthorn 15g, fragrant tea vegetable 15g, conch mountain 15g | 8 |
| Shaofu Zhuyu decoction (SZD) | Zingiberis Rhizoma 3g, Cortex Cinnamomi 3g, Corydalis Rhizoma 3g, Trogopteri Feces 6g, Angelicae Sinensis Radix 9g, Radix Paeoniae Rubra 6g, Typhae Pollen 9g, Myrrha 6g, Rhizoma Chuanxiong 6g, and Foeniculi 1.5g | 9 |
| Tokishakuyakusan (TSS) | Lanceae Rhizoma, Cnidii Rhizoma, Paeoniae Radix, Angelicae, Angelicae, Hoelen | 10 |

**Table S4 Targets and study methods of multiple component prescriptions against endometriosis.**

| **Prescription** | **Cell line and model** | **Signaling pathway** | **Molecular Targets** | **Mechanism** | **Assay** | **Positive control** | **Administration route** | **Frequency** | **Dose** | **Negative control** | **Ref** |
| --- | --- | --- | --- | --- | --- | --- | --- | --- | --- | --- | --- |
| Cai’s Neiyi Prescription (CNYP) | Ectopic endometrial stromal cells; female Sprague-Dawley rats | MAPK/ERK | IL-1β, IL-6, TNF-α and TGF-β1, Bcl-2 ↓;  Bax and Caspase-7 ↑;  USP10 mRNA and protein expression ↓;  ERK1/2 activation ↓ | Anti-inflammation;  pro-apoptosis | Western blotting; ELISA; H&E; Cell transfection; Real-time qPCR | Gestrinone (60 mg/kg,  twice a day for three weeks) | Gavage | Twice a  day for 3 weeks | Low-dose CNYP granule (1.32 g/kg); high-dose CNYP granule (2.64 g/kg) | FBS | 2 |
| Danefukang Jiangao (DEFK) | Patients (RCT) | - | Attenuate depression and anxiety;  CA-125, IL-6, TNF-α, VEGF ↓ | Anti-inflammation | ELISA; QOL scores; SDS and SAS scores | Mifepristone (at the beginning of a menstrual cycle, an initial dose  of 12.5 mg, then 6.25 mg once daily for 10 days for a total of three  menstrual cycles) | Oral | Twice daily  beginning 15 days before the menstrual cycle for a total of three  cycles | 15 g | - | 11 |
| Guizhi fuling decoction (GZFLD) | Sprague Dawley rats; hEM15A | PI3K/Akt | IL-6, IL-1β, TNF-α, NF200 ↓ | Anti-inflammation;  relieve pain | Hot-plate test; Western blot; | - | Oral | Once a day for 30 days | 4.05 g/kg; 8.10 g/kg | Distilled water | 5 |
| Huangzhi Neiyi capsule (HZNYC) | Sprague-Dawley rats | HIF-1a/VEGF | PCNA, CD31, VEGF mRNA, HIF1A mRNA ↓ | Anti-angiogenesis | IHC; ELISA; RT-qPCR | Gestrinone (0.25 g/kg， twice a  week for 28 days) | Oral | Once a day for 28 days | Low-dose  HZNY (4.5 g/kg) group；  high-dose  HZNY (9 g/kg) group | Double-steamed water | 6 |
| NeiyiKangfu Tablet (NYKFT) | Female C57BL/6; hEM15A | RAF/MEK/ERK | Bax, cleaved caspase-3 ↑;  Bcl-2 ↓;  IL-6, TNF-α ↓;  RKIP ↑ | Anti-inflammation; pro-apoptosis; anti-proliferation; Inhibit migration | HE staining; IHC; TUNEL; siRNA knockdowns; CCK-8; Flow cytometry; Transwell assay; ELISA; Real-time PCR; Western blot | - | Gavage | Once a day for 3 weeks | Low-dose  NYKF group (0.107 g/mL)；medium-dose NYKF group (0.215 g/  mL)；high-dose NYKF group (0.43 g/mL) | Distilled water | 12 |
| Neiyi Prescription of QIU (NYPQ) | Sprague Dawley rats; HUVECs | PPARγ/NF‑κB | Beclin-1, Lc3-II, LC3-II/LC3-I ↑;  VEGF ↓ | Autophagy; anti-angiogenesis | HE staining; Immunohistochemistry; MTT; flow cytometry; western blot; lumen formation experiment | VEGF monoclonal antibody (intraperitoneally injected  with 3 mg/g/d) | Gavage | Once a day for 4 weeks | L-NYPQ (5mg/g); M-NYPQ (10mg/g); H-NYPQ group (20mg/g) | Distilled water | 13 |
| Shaofu Zhuyu decoction (SZD) | Female Sprague-Dawley rats | - | PCNA ↓; CD34 ↓; HIF-1α ↓; | Pro-apoptosis; anti-proliferation; microvessel density | HE staining; IHC; TUNEL; | - | Gavage | Once a day for 4 weeks | 1 mL (1 g/mL) SZD | Vehicle | 14 |
| Tokishakuyakusan (TSS) | BALB/c mice | - | IL-33 ↓; Ptgs2(COX-2) mRNA ↓ | Anti-inflammation; relieve pain | Hot plate test; IHC; RT-PCR | - | Oral | Once a day for 2 weeks | 1.0 g/kg | Vehicle | 15 |
| Tokishakuyakusan (TSS) | HESCs; peritoneal macrophages；female Sprague-Dawley rats | - | IL-8 ↓; VEGF ↓ | Anti-inflammation; anti-angiogenesis | ELISA; tandem mass spectrometry (LC-MS/MS) | - | Oral | Once | 4 g/kg | DMSO | 16 |

**Table S5 Extract of plants/herbs against endometriosis.**

| **Extract** | **Cell line and model** | **Signaling pathways** | **Molecular Targets** | **Mechanism** | **Assay** | **Positive control** | **Administration route** | **Frequency** | **Dose** | **Negative control** | **Ref** |
| --- | --- | --- | --- | --- | --- | --- | --- | --- | --- | --- | --- |
| Achillea cretica L. (AC)aerial extract | Wistar rats | - | IL-6, TNF-α, VEGF ↓ | Anti-inflammation | Histopathological; ELISA | Letrozole (0.2 mg/kg) | Gavage | Once a day for 4 weeks | 100 mg/kg; 200 mg/kg; 400 mg/kg | Normal saline | 17 |
| Basil (Ocimum basilicum L) leaves extract | Mus musculus | - | VEGF ↓ | Anti-angiogenesis | IHC | - | Not mentioned | Once a day for 2 weeks | 0.21  mg/g-BW; 0.42 mg/g-BW; 0.84 mg/g-BW | Vehicle | 18 |
| Boswellia serrata gum resin extract (BS) | Mice (Mus musculus) | - | VEGF ↓ | Anti-angiogenesis | IHC | - | Oral | Once a day for 7 days | 100 mg/Kg | Not mentioned | 19 |
| Calligonum comosum (Escanbil) extract | HDMEC; BALB/c mice | PI3K/Akt/eNOS | Ki-67 ↓;  density of CD31+microvessels ↓; CD68+macrophages ↓; CD3+lymphocytes ↓;  vascularization ↓ | Anti-inflammation; anti-proliferation; anti-angiogenesis | WST-1 assay; LDH assay; transwell migration assay; scratch wound healing assay; Spheroid sprouting assay; ultrasound imaging; Histology and immunohistochemistry | - | Intraperitoneal injection | Every other day for 4 weeks | 50 mg/kg | Vehicle | 20 |
| Cyperi rhizoma extract (CRE) | 12Z | Akt and NF-kB | mRNA expression of P-cadherin and MMP-2 ↓; Neurotrophins (BDNF, NGF, NT-3 and NT-4/5 mRNA) ↓; Akt phosphorylation ↓; NF-kB inactivation; the phosphorylation of both IkBα and IKKα/β ↓ | Inhibit the adhesion; relieve pain | Network Pharmacology;  Transfection; MTT; Adhesion Assay; Western Blotting; RT-qPCR | - | - | - | - | Not mentioned | 21 |
| Extract of Polygala fallax Hemsl (PFHF) | HEcESCs | PI3K/AKT | PI3K, AKT, Bcl-2, Bcl-xL ↓;  Bad ↑ | Inhibit proliferation; Inhibit migration; Inhibit invasion | CCK-8; Flow cytometry; Transwell Migration assay; Transwell Invasion assay; Real-time PCR; Western blot | - | - | - | - | Not mentioned | 22 |
| Pueraria Flower Extract (PFE) | Human Endometriotic Cells; 11Z and 12Z; human mesothelial Met5A cells; Female mice (BALB/c) | MAPK/ERK1/2 | Protein and mRNA of MMP-2 and MMP-9 ↓ | Inhibit adhesion and migration | Wound-healing; transwell migration assays; MTT; Adhesion Assay; Western Blot; RT-PCR | - | Oral | Once a day for 5 weeks | 150 mg/kg; 300 mg/kg | Vehicle (PBS) | 23 |
| Saponin Extract | HESCs | miR-21-5p | Caspase 3 mRNA and protein expression ↑;  miR-21-5 expression, Ki-67 ↓ | Pro-apoptosis | Flow cytometry; microarray profiling; MTT; Cell Transfection; RT-PCR; Hoechst 33342 nucleic acid stain (Apoptosis Assay); Western Blot | - | - | - | - | Vehicle | 24 |
| Zingiber officinale Roscoe (Ginger) extract | Wistar rats | PI3K/AKT | IL-6, TNF-a ↓ | Antioxidant; anti-inflammation | ELISA, H&E | - | Gavage | Once a day for 2 weeks | 0.5 mg/100 g | 0.9% sodium chloride solution 0.9% | 25 |
| Extract of Urtica dioica L. | Female Wistar albino rats | - | TNF-α, IL-6, VEGF ↓ | Anti-inflammation | ELISA, H&E | Buserelin acetate (Subcutaneous injection, 20 mg/rat/week) | Oral | Once a day for 4 weeks | 100 mg/kg | Not mentioned | 26 |

**Table S6 Purified bioactive compounds against endometriosis.**

| **Compound** | **Cell line and models** | **Signaling**  **pathways** | **Molecular Targets** | **Mechanism** | **Assay** | **Positive control** | **Administration route** | **Frequency** | **Dose** | **Negative control** | **Ref** |
| --- | --- | --- | --- | --- | --- | --- | --- | --- | --- | --- | --- |
| Apigenin | VK2/E6E7 and End1/E6E7 cells | PI3K/AKT; MAPK | Cytosolic calcium ↑;  ROS ↑;  UPR ↑;  lipid peroxidation ↑;  ER Stress ↑;  Bax ↑;  cytochrome c ↑;  disrupts MMP;  PERK, eIF2α, GRP78, and GADD153 ↑;  phosphorylation of ERK1/2, JNK, P70S6K  and S6 proteins ↓; ROS ↑ | Pro-apoptosis;  anti-proliferation;  anti-inflammation | Cell Proliferation ELISA BrdU kit;  Immunofluorescence microscopy;  TUNEL assay;  flow cytometry;  Mitochondria  staining kit;  Western blot;  Click-iT lipid peroxidation imaging kit | - | - | - | - | DMSO | 27 |
| Carnosic acid (CA) and rosmarinic acid (RA) | Female BALB/c mice;  ESCs;  T-HESC | - | PCNA ↓;  ROS ↓;  Cell cycle arrest (G2/M phase) | Anti-oxidant;  anti-inflammation;  anti-proliferation;  pro-apoptosis; | Flow cytometry;  MTS;  Western blot;  ELISA;  Immunohistochemistry;  TUNEL assay | - | Intraperitoneal injection | Once a day for 2 weeks | CA 2 mg/kg; CA 20 mg/kg; RA 1 mg/kg; RA 3 mg/kg | DMSO | 28 |
| Chrysin | End1/E6E7 and VK2/E6E7 cells | PI3K/AKT;  activating the ER stress | PERK，eIF2α ↑;  the cytosolic calcium level, ROS ↑;  changing the cell cycle proportion;  Phosphorylation of PERK and eIF2α proteins ↑;  GRP78 ↑;  cell cycle arrest | Anti-proliferation;  pro-apoptosis | Flow cytometry;  Western blot;  Cell Proliferation  ELISA BrdU kit | - | - | - | - | Vehicle | 29 |
| Curcumol | Ectopic endometrial stromal cells;  Sprague-Dawley rats | JAK2 and STAT3 | TNF-α, IL-6, and IL-1β ↓;  Bax and caspase-3 proteins ↑；  Bcl2 ↓ | Anti-inflammation;  anti-proliferation;  pro-apoptosis;  weaken cell migration ability; | MTT assay;  flow cytometry;  wound healing assay;  ELISA kits;  Western blot | AG490 (JAK2/STAT3 inhibitor) (intraperitoneal injection  , 4 mg/kg, twice a week | Gavage | Once a day for 30 days | 20 mg/kg | Not mentioned | 30 |
| Daidzein-rich isoflavone aglycones (DRIAs) | OESCs;  NESCs;  Female BALB/c mice | NF-kB | IL-6, IL-8, COX-2 ↓;  aromatase, PGE2 ↓;  the number, weight, of endometriosis-like lesions ↓;  Ki-67-positive cells ↓ | Anti-proliferation; anti-inflammation | WST-8;  cytotoxicity assay;  RT-PCR;  immunofluorescence cytochemistry;  Western blot;  ELISA;  aromatase enzyme assay;  immunofluorescence staining | - | Edible | 3 weeks | 0.6% DRIA food (0.19  g/kg) | Iso-40; isoflavone glycoside; normal food | 31 |
| Dehydrocostus Lactone (DHL) | 12Z | Akt and NF-κB | PGE2 and COX2 ↓;  neurotrophins (BDNF, NGF, NT3, NT4/5) ↓;  M2 markers (CD206, Trem-2) ↓;  IL-10 ↓;  VEGF ↓;  MMP-2/-9 ↓ | Pro-apoptosis;  inhibition of the alternative activation of EAMs | MTT;  ELISA;  flow cytometry;  Western Blot;  RT-PCR | - | - | - | - | Not mentioned | 32 |
| Delphinidin | VK2/E6E7 and End1/E6E7 cells | MAPK and Akt | Mitochondrial membrane potential ↓;  cytosolic calcium ↓;  the phosphorylation of ERK1/2, Akt, P70S6K, and S6 ↓;  the phosphorylation of P38, MAPK and P90RSK ↑;  PCNA ↓ | Anti-proliferation; pro-apoptosis | Cell proliferation ELISA BrdU kit;  Immunofluorescence;  Flow cytometry;  TUNEL assay;  Mitochondria staining  kit;  Western blot | - | - | - | - | Vehicle | 33 |
| Dimethylchrysin | VK2/E6E7 and End1/E6E7 cells | PI3K/Akt and MAPK | DNA fragmentation ↑;  loss of MMP;  ROS and lipid peroxidation ↑;  GRP78 and IRE1α ↑;  phosphorylated p70S6K and S6 ↓;  phosphorylation of Akt ↓;  cytoplasmic and mitochondrial calcium levels in VK2/E6E7 ↑;  cytoplasmic and mitochondrial calcium levels in End1/E6E7 cells ↓;  cell cycle  arrest. | Anti-proliferation, pro-apoptosis;  DNA fragmentation; | Cell proliferation ELISA;  BrdU kit;  Immunofluorescence analysis;  Flow cytometry;  TUNEL staining;  mitochondrial staining kit;  Click-iT lipid peroxidation  Imaging kit;  Western blot | - | - | - | - | DMSO | 34 |
| Ellagic acid | HESCs;  Primary human endometrial epithelial cells;  ECC-1;  T-HESC | - | Arrest cell cycle at G2/M phase | Inhibit the migration and  adhesion | WST-1 Cell Proliferation Kit;  flow cytometry;  wound healing assay;  Adhesion assay | - | - | - | - | Vehicle | 35 |
| Epigallocatechin-3-gallate (EGCG) | EECs;  BALB/c female nude mice | DNA  methylation of E-cadherin promoter | E-cadherin ↑ | Demethylate the promoter region of E-cadherin | Living image system;  H&E;  IHC;  PCR | Decitabine (0.3 μg/  μL) | Intraperitoneal injection | Once in 2 days for 16 days | 8.333 mg/mL | Normal saline | 36 |
| Flavokawain A | Sprague-Dawley rats | PI3K/AKT;  NF-κB | IL-1β，IL-8 ↓;  COX-2 ↓;  PGE2 ↓;  NO ↓;  bcl-2 ↓;  Bax, cleaved-caspase3 ↑;  VEGF ↓; | Anti-inflammation;  pro-apoptosis;  anti-angiogenesis | ELISA;  RT-qPCR;  Western blot;  H&E;  immunofluorescence | Luteolin (50 mg/kg/day) | Gavage | Once a day for 6 weeks | Low dose FK A (10 mg/kg);  high dose FK A (50 mg/kg) | 1.0 % DMSO | 37 |
| Gamma Oryzanol (GO) | Female Wistar albino rats | - | BECN1 ↑;  SF1 ↓ | Pro-apoptosis | Western blot;  TUNEL; | Vit. C (1300 mg/kg/day) | Oral | Once a day for 4 weeks | 3000 µg/kg GO;  6000 µg/kg GO | Normal saline | 38 |
| Ginsenoside PPD | EESCs | - | ERα ↓;  PR ↑;  BAX/BAK)/ (Bcl-2/Bcl-xL) ↑;  enhanced the killing activity of NK cells | Pro-apoptosis;  autophagy | Real Time-qPCR;  Western blotting;  CCK-8 assay;  flow cytometry;  IF;  IHC | Esculentoside A | - | - | - | Vehicle | 39 |
| Hesperidin and nerolidol | Adult female Wistar albino  rats | - | Volume of  the lesions ↓;  MDA ↓;  GSH ↑;  SOD ↑; | Antioxidant | H&E | - | Gavage | Once a day for 2 weeks | Nerolidol (100 mg/kg) and hesperidin (50 mg/kg) | Not mentioned | 40 |
| Isoliquiritigenin (ISL) | End1/E6E7 cells;  female Balb/c mice | - | E-cadherin ↑; N-cadherin, Slug and Snail ↓;  the volume and weight of endometriotic lesions ↓;  PCNA, VEGF, IL-1β and IL-6 ↓;  Bax and cleaved caspase-3 ↑;  Bcl-2 ↓ | Pro-apoptosis;  EMT;  proliferation;  anti-inflammation | MTT assay;  wound-healing assay;  western blot;  Trypan blue exclusion test;  IHC | - | Gavage | Once a day for 4 weeks | 1 mg/kg; 5 mg/kg | Vehicle (corn oil) | 41 |
| Kaempferol (KP) | Ishikawa | PI3K/AKT/MMPs | PTEN ↑;  MMP9 ↓ | Anti-migration; anti-invasion | CCK-8;  Colony‑forming assay;  Wound healing test;  Transwell test;  RT‑PCR;  Western blot | - | - | - | - | Vehicle | 42 |
| Luteolin | VK2/E6E7 and End1/E6E7 cells;  female C57BL/6 mice | Mitochondrial and endoplasmic reticulum apoptotic pathways | Ccne1, Cdk2, and Cdk4 ↓;  Cytosolic calcium levels, ROS and lipid peroxidation ↑;  PCNA ↓;  inhibits the growth of lesions | Anti-proliferation;  pro-apoptosis | Cell Proliferation ELISA;  flow cytometry;  TUNEL assay;  Western blot;  RT-PCR;  siRNA transfection;  Click-iT lipid peroxidation imaging kit | - | Intraperitoneal injection | Every 3 days for a total of  10 times | 40 mg/kg | Vehicle (DMSO) | 43 |
| Myricetin | VK2/E6E7 and End1/E6E7 cells;  Female C57BL/6 mice | p38MAPK | Ccne1 mRNA expression ↓;  ROS ↑;  calcium ions ↑;  DNA fragmentation ↑ | Anti-proliferation;  pro-apoptosis; | Cell Proliferation ELISA;  BrdU kit TUNEL assay;  flow cytometry;  mitochondria staining kit;  Western blot;  siRNA transfection; RT-PCR | - | Intraperitoneal injection | Every 3 days for a month | 30 mg/kg | DMSO | 44 |
| Naringenin | Adult female SD rats | MAPK and AKT;  Nrf2/HO1/NQO1/Keap1 | VEGF ↓;  loss of MMP;  MMP-2, MMP9 ↓;  ROS ↑;  TNF-α, Bcl-2, NO ↓；  Caspase-3, Cyt-c ↑;  Nrf2, HO1、NQO1 ↓;  Keap1 ↑ | Pro-apoptosis;  anti-invasion;  antioxidant;  anti-proliferation;  anti-inflammation;  anti-angiogenesis | H&E;  IHC;  ELISA;  Griess reagent system kit;  MTT;  flow cytometer;  Transwell Migration Assay;  western blot | Dienogest (0.3 mg/kg) | Oral | Once a day for 3 weeks | 50 mg/kg | Vehicle | 45 |
| Naringenin | VK2/E6E7 and End1/E6E7 cells | MAPK  and AKT | ROS ↑;  BAX ↑;  eIF2α, IRE1α, GADD153, GRP78 proteins ↑;  PCNA ↓;  Depolarization of MMP  cell cycle arrest | Pro-apoptosis;  anti-proliferation; ERS | TUNEL;  invasion assays;  western blot;  flow cytometry;  Cell Proliferation ELISA; Mitochondria staining kit;  Click-iT lipid peroxidation imaging kit | - | - | - | - | Vehicle | 46 |
| Nobiletin | HEK293 cells;  endometriotic stromal cells;  C57BL/6  female mice | NF-κB | PCNA, VEGF ↓;  E-cadherin ↑;  IL-6, IL-1β, TNF-α ↓;  MMP-1 and MMP-3 ↓;  IKKs ↓;  lesion size and hotplate latency ↓ | Anti-angiogenesis;  anti-inflammation | Immunostaining;  RT-PCR;  western blotting;  Transfection;  immunochemistry;  hotplate test;  Luciferase assay | - | Intraperitoneal injection | Once a day for 4 weeks | 10 mg/kg; 20 mg/kg | Not mentioned | 47 |
| Oleuropein | C57BL/6 J;  SCID female mice;  IHEECs;  IHESCs | - | Ki-67 ↓;  ERβ ↓;  cleaved caspase 3 ↑;  Csf3 ↓;  Sicam1 ↓;  Il1rn ↓;  Csf1 ↓;  Ccl2 ↓;  Cxcr ↓;  Timp-1 ↓;  Ccl12 ↓; | Anti-proliferation;  pro-apoptosis;  anti-inflammation; | IHC;  Immunofluorescence;  MTS;  ERβ‑knockdown;  Proteomic Profiler Mouse Cytokine  Array Kit;  Western blot;  CHIP-Seq | - | Oral and intraperitoneal injection | Once a day for 3 weeks (intraperitoneal injection), once a day for 31 days (Oral) | 25 mg/kg (ip); 25 mg/kg (Oral);200 mg/kg (Oral) | Vehicle | 48 |
| Quercetin | VK2/E6E7 and END1/E6E7 cells;  Mature female C57BL/6 mice | PI3K/AKT;  MAPK | Phosphorylation of ERK1/2, P90RSK, P38, Akt, P70S6K, and S6 proteins ↓;  the expression of Ccnd1 mRNA and protein ↓;  MMP loss;  ROS ↑;  miR-503-5p ↑ | Anti-proliferation; pro-apoptosis | ELISA; PCNA;  TUNEL assay;  WB;  RT-PCR;  IHC;  SiRNA transfection;  H&E staining | - | Intraperitoneal injection | Every 3 days for a month | 35  mg/kg | DMSO | 49 |
| Resveratrol | Endometriosis patients | - | TNF-α, VEGF gene and protein expression ↓ | Anti-inflammation;  anti-angiogenesis | Western blot;  RT-PCR | - | Oral | Twice daily for 12-14 weeks | 400 mg | Placebo tablets | 50 |
| Resveratrol | Immortalized endometrial stromal (St-T1b);  endometriotic epithelial (12Z) cells;  patient-  derived primary endometriotic  stromal cells;  endometrial cell  lines | - | Caspase-3 ↑;  VEGF ↓;  MMP2/TIMP1 ↓;  Ang-1 ↓ | Pro-apoptosis;  anti-migration;  anti-inflammation;  anti-invasion;  anti-angiogenesis | Wound healing assay;  MTT;  flow cytometry;  Western blotting;  RT-PCR | - | - | - | - | Vehicle (0.1% DMSO) | 51 |
| Scutellarin | Female Balb/c mice | NF-κB;  TGF-β | Lesion weight ↓;  Platelet Activation ↓;  α-SMA, collagen I and LOX ↓;  improved hyperalgesia;  FMT ↓;  Platelet Aggregation ↓ | Anti-proliferation;  anti-angiogenesis, anti-fibrosis | Hotplate test;  IHC;  Flow Cytometry;  Masson Trichrome Staining;  H&E | - | Intraperitoneal injection | Every 2 days for 2 weeks | LS group 7.5 mg/k; HS group 15 mg/kg | Vehicle | 52 |
| Silymarin | Patient (RCT) | - | Serum IL-6 ↓;  reduce the size of endometrioma lesions | Alleviate pain;  anti-inflammation | ELISA;  Sonography;  self-report questionnaires | - | Oral | Twice daily for 12 weeks | 140 mg | Placebo | 53 |
| Silibinin | VK2/E6E7 and End1/E6E7 cells;  female C57BL/6 mice | MAPK;  ERS | Calcium concentration ↑;  mitochondrial dysfunction;  ROS ↑;  TNF‐α, IL‐1β, and IL‐6 ↓ | Oxidative stress;  lipid peroxidation;  anti-proliferation;  pro- apoptosis;  anti-inflammation | Cell proliferation ELISA;  Immunofluorescence;  flow cytometry;  The Click-iT lipid peroxidation imaging kit;  mitochondrial staining kit;  Western blot;  RT-PCR | - | Intraperitoneal injection | Once every 3 days for 4 weeks | 100 mg/kg | DMSO | 54 |
| Tetramethylpyrazine (TMP) | 11Z;  HESCs;  female Balb/C mice | - | Aggregation of Platelets ↓;  TGF‑β1 ↓,  NK1R ↓;  α‑SMA and Collagen I ↓;  E-cadherin ↑ | Anti-fibrosis;  alleviate  hyperalgesia | RT-PCR;  Western blot;  cell contractility assay;  collagen assay;  Hotplate Test | - | Alzet pumps | 2 weeks | L-TMP group (25 mg/kg); H-TMP group (100 mg/kg) | 50% anhydrous ethanol | 55 |
| Ursolic Acid (UA) | HESCs;  HUVECs | MAPK (JNK and p38) | COX-2 ↓;  PGE2 ↓;  VEGF ↓ | Anti-proliferation;  pro-apoptosis;  anti-angiogenesis | MTT;  ELISA;  Western Blot | - | - | - | - | Vehicle | 56 |
| Wogonin (WG) | Female BALB/c mice;  ESCs;  T-HESC | - | ROS ↑;  ERα ↓；  Cell cycle arrest (G2/M phase) | Oxidant;  anti-inflammation;  anti-proliferation;  pro-apoptosis; | Flow cytometry;  MTS;  Western blot;  ELISA;  Immunohistochemistry;  TUNEL assay | - | Gavage | Once a day for 12 days | 20 mg/kg | DMSO | 28 |

**Table S7 Pharmacokinetic parameters of the bioactive compounds.**

| **Compound** | **OB (%)** | **Intestinal epithelial permeability** | **Blood-brain barrier** | **Half-life (h)** | **TPSA** | **Number of rotating bonds** |
| --- | --- | --- | --- | --- | --- | --- |
| Apigenin | 23.06 | 0.43 | -0.61 | - | 90.90 | 1 |
| Carnosic acid (CA) | - | - | - | - | - | - |
| Chrysin | 22.61 | 0.70 | 0.01 | - | 70.67 | 1 |
| Curcumol | 103.55 | 1.12 | 1.23 | 9.38 | 29.46 | 1 |
| Daidzein-rich isoflavone aglycones (DRIAs) | 19.44 | 0.59 | -0.22 | - | 70.67 | 1 |
| Dehydrocostus Lactone (DHL) | 58.57 | 1.27 | 1.35 | 2.53 | 26.30 | 0 |
| Delphinidin | 40.63 | -0.02 | -0.81 | 1.16 | 134.52 | 1 |
| Dimethylchrysin | - | - | - | - | - | - |
| Ellagic acid | 43.06 | -0.44 | -1.41 | -1.04 | 141.34 | 0 |
| Epigallocatechin-3-gallate (EGCG) | 55.09 | -0.57 | -1.70 | 1.70 | 197.37 | 4 |
| Flavokawain A | - | - | - | - | - | - |
| Gamma Oryzanol (GO) | - | - | - | - | - | - |
| Ginsenoside PPD | - | - | - | - | - | - |
| Hesperidin | 13.33 | -2.03 | -2.70 | - | 234.29 | 7 |
| Isoliquiritigenin (ISL) | 85.32 | 0.44 | -0.41 | 17.66 | 77.76 | 3 |
| Kaempferol (KP) | 41.88 | 0.26 | -0.55 | 14.74 | 111.13 | 1 |
| Luteolin | 36.16 | 0.19 | -0.84 | 15.94 | 111.13 | 1 |
| Myricetin | 13.75 | -0.15 | -1.01 | - | 151.59 | 1 |
| Naringenin | - | - | - | - | - | - |
| Nerolidol | - | - | - | - | - | - |
| Nobiletin | 61.67 | 1.05 | -0.08 | 16.20 | 85.59 | 7 |
| Oleuropein | 4.95 | -1.25 | -1.70 | - | 201.67 | 11 |
| Quercetin | 46.43 | 0.05 | -0.77 | 14.40 | 131.36 | 1 |
| Resveratrol | 19.07 | 0.80 | -0.01 | - | 60.69 | 2 |
| Rosmarinic acid (RA) | 1.38 | -0.54 | -1.24 | - | 144.52 | 7 |
| Scutellarin | 2.64 | -1.08 | -2.13 | - | 207.35 | 4 |
| Silibinin (Silymarin) | 0.93 | -0.71 | -1.77 | - | 155.14 | 4 |
| Tetramethylpyrazine (TMP) | 20.01 | 1.19 | 1.05 | - | 25.78 | 0 |
| Ursolic Acid (UA) | 16.77 | 0.67 | 0.07 | - | 57.53 | 1 |
| Wogonin (WG) | 30.68 | 0.79 | 0.04 | 17.75 | 79.90 | 2 |

Note: oral bioavailability (OB), topologically polar surface area (TPSA).

**References**

1. Hang YY, Tan L, Cao Y, Zhuang MF, Jin YL. Mechanism of Cai’s Neiyi Prescription regulating TRIM24/NLRP3 inflammasome-mediated endometriotic pyroptosis in rats. *Shanghai Journal of Traditional Chinese Medicine* **2021,** *55* (09), 74-80.

2. Li SD, Zhu YP, Zhang TT, Hang YY, Chen Q, Jin YL. Cai's Neiyi Prescription promotes apoptosis and inhibits inflammation in endometrial stromal cells with endometriosis through inhibiting USP10. *Biotechnol Appl Biochem* **2019,** *66* (2), 231-239.

3. Fu XY, Wei SB, Feng TT. Different effects of Danefukang Decoction on the expression of MMP-2 and VEGF in eutopic and ectopic endometrium of adenomyoma mice. *Chinese Traditional Patent Medicine* **2013,** *35* (11), 2523-2525.

4. Dai YF, Qiang WJ, Yu XK, Cai SW, Lin KQ, Xie L, Lan X, Wang D. Guizhi Fuling Decoction inhibiting the PI3K and MAPK pathways in breast cancer cells revealed by HTS(2) technology and systems pharmacology. *Comput Struct Biotechnol J* **2020,** *18*, 1121-1136.

5. Gao Y, Ji WJ, Lu M, Wang ZH, Jia XR, Wang DW, Cao P, Hu CP, Sun XY, Wang ZG. Systemic pharmacological verification of Guizhi Fuling decoction in treating endometriosis-associated pain. *J Ethnopharmacol* **2022,** *297*, 115540.

6. Liu HL, Sun XL, Zhao Y, Xia M, Wang CX. Anti-angiogenesis effect and mechanism study of Huangzhi Neiyi capsule in a rat endometriosis model. *J Int Med Res* **2020,** *48* (1), 300060519899767.

7. Wei SB, Cao YF, Wang Y. Effect of Neiyi Kangfu suppository on expressions of cytochrome C and survivin in ectopic and eutopic endometrium in rats with endometriosis. *Zhongguo Zhong Xi Yi Jie He Za Zhi* **2008,** *28* (2), 139-41.

8. Yang HD, Xia MT, Wu YP, Wang XE. Effect of medicated serum of Qiu's Neiyi Recipe on angiogenic ability of human umbilical vein endothelial cells. *Chinese Archives of Traditional Chinese Medicine* **2016,** *34* (10), 2545-2547.

9. Chen YH, Mao HY, Wu QS, Zhang XH, Shen J, Feng P, Huang CC, Ji XJ. Mechanism of Shaofu Zhuyu Decoction in treatment of endometriosis-associated dysmorrhea with syndrom of cold coagulation and blood stasis based on MSK1/2. *China Journal of Traditional Chinese Medicine* **2022**, 47(17), 4674-4681.

10. Nagamatsu T, Fujii T, Schust DJ, Tsuchiya N, Tokita Y, Hoya M, Akiba N, Iriyama T, Kawana K, Osuga Y, Fujii T. Tokishakuyakusan, a traditional Japanese medicine (Kampo) mitigates iNKT cell-mediated pregnancy loss in mice. *Am J Reprod Immunol* **2018,** *80* (4), e13021.

11. Zhong YC, Zhou XF, Hou CM, Li WP. Effect of danefukang on symptoms and biomarkers in women with endometriosis. *Taiwan J Obstet Gynecol* **2019,** *58* (2), 218-222.

12. Wen Y, Fan LX, Pang LL, Zhao TT, Li RN, Zhang Y, Zhang LY, Yang W. NeiyiKangfu tablets control the progression of endometriosis through inhibiting RAF/MEK/ERK signal pathway by targeting RKIP. *Gynecol Endocrinol* **2022,** *38* (12), 1136-1146.

13. Yang HD, Zhu QF, Li H, Jiang XL, Xu XQ, Guo Y. Effect of Neiyi Prescription of QIU on autophagy and angiogenic ability of endometriosis via the PPARγ/NF-κB signaling pathway. *Arch Gynecol Obstet* **2022,** *306* (2), 533-545.

14. Zhu GH, Jiang CH, Yan X, Zhao S, Xu DJ, Cao Y. Shaofu Zhuyu Decoction Regresses Endometriotic Lesions in a Rat Model. *Evid Based Complement Alternat Med* **2018,** *2018*, 3927096.

15. Nagira K, Taniguchi F, Nakamura K, Tokita Y, Tsuchiya N, Khine YM, Harada T. Tokishakuyakusan, a Kampo medicine, attenuates endometriosis-like lesions and hyperalgesia in murine with endometriosis-like symptoms. *Am J Reprod Immunol* **2019,** *82* (5), e13182.

16. Takeuchi A, Koga K, Tokita Y, Matsumoto T, Satake E, Taguchi A, Makabe T, Miyashita M, Takamura M, Harada M, Hirata T, Hirota Y, Wada-Hiraike O, Fujii T, Osuga Y. The effects of tokishakuyakusan, a traditional Japanese medicine (kampo), ferulic acid and paeoniflorin, on human endometriotic stromal cells and peritoneal macrophages. *J Reprod Immunol* **2020,** *139*, 103104.

17. Bina F, Daglia M, Santarcangelo C, Baeeri M, Abdollahi M, Nabavi SM, Tabarrai M, Rahimi R. Phytochemical profiling and ameliorative effects of Achillea cretica L. on rat model of endometriosis. *J Ethnopharmacol* **2020,** *254*, 112747.

18. A'Yuni D Q, Sa'adi A, Widjiati W. Ethanol extract of basil (Ocimum Basilicum L.) leaves inhibits endometriosis growth in a mouse model by modulating vascular endothelial growth factor (VEGF) expression. *J Med Life* **2023,** *16* (8), 1224-1230.

19. D'Amico R, Impellizzeri D, Cordaro M, Siracusa R, Interdonato L, Crupi R, Gugliandolo E, Macrì F, Di Paola D, Peritore AF, Fusco R, Cuzzocrea S, Di Paola R. Regulation of Apoptosis and Oxidative Stress by Oral Boswellia Serrata Gum Resin Extract in a Rat Model of Endometriosis. *Int J Mol Sci* **2022,** *23* (23).

20. Kiani K, Rudzitis-Auth J, Scheuer C, Movahedin M, Sadati Lamardi SN, Malekafzali Ardakani H, Becker V, Moini A, Aflatoonian R, Ostad SN, Menger MD, Laschke MW. Calligonum comosum (Escanbil) extract exerts anti-angiogenic, anti-proliferative and anti-inflammatory effects on endometriotic lesions. *J Ethnopharmacol* **2019,** *239*, 111918.

21. Ahn JH, Choi JM, Kang ES, Yoo JH, Cho YJ, Jang DS, Choi JH. The Anti-Endometriotic Effect of Cyperi Rhizoma Extract, Inhibiting Cell Adhesion and the Expression of Pain-Related Factors through Akt and NF-kB Pathways. *Medicina (Kaunas)* **2022,** *58* (3).

22. Zhong CM, Ju GCH, Yang SF, Zhao XP, Chen JX, Li N. Total Flavonoids of Polygala fallax Hemsl Induce Apoptosis of Human Ectopic Endometrial Stromal Cells through PI3K/AKT/Bcl-2 Signaling Pathway. *Gynecol Obstet Invest* **2023,** *88* (4), 197-213.

23. Kim JH, Woo JH, Kim HM, Oh MS, Jang DS, Choi JH. Anti-Endometriotic Effects of Pueraria Flower Extract  in Human Endometriotic Cells and Mice. *Nutrients* **2017,** *9* (3).

24. Park JH, Lee SK, Kim MK, Lee JH, Yun BH, Park JH, Seo SK, Cho S, Choi YS. Saponin Extracts Induced Apoptosis of Endometrial Cells From Women With Endometriosis Through Modulation of miR-21-5p. *Reprod Sci* **2018,** *25* (2), 292-301.

25. Filho JMM, Neto JN, Gomes L, Ramos ISF, Oliveira SSR, Melo GCF, Silva LA, Moura ECR, Leal PDC. Zingiber officinale Roscoe (Ginger) as a Complementary Option for Clinical Treatment of Endometriosis: An Experimental Study in Rats. *J Med Food* **2021,** *24* (4), 342-347.

26. Ilhan M, Ali Z, Khan IA, Taştan H, Küpeli Akkol E. Bioactivity-guided isolation of flavonoids from Urtica dioica L. and their effect on endometriosis rat model. *J Ethnopharmacol* **2019,** *243*, 112100.

27. Park S, Lim W, Bazer FW, Song G. Apigenin induces ROS-dependent apoptosis and ER stress in human endometriosis cells. *J Cell Physiol* **2018,** *233* (4), 3055-3065.

28. Ferella L, Bastón JI, Bilotas MA, Singla JJ, González AM, Olivares CN, Meresman GF. Active compounds present inRosmarinus officinalis leaves andScutellaria baicalensis root evaluated as new therapeutic agents for endometriosis. *Reprod Biomed Online* **2018,** *37* (6), 769-782.

29. Ryu S, Bazer FW, Lim W, Song G. Chrysin leads to cell death in endometriosis by regulation of endoplasmic reticulum stress and cytosolic calcium level. *J Cell Physiol* **2019,** *234* (3), 2480-2490.

30. Wang Y, Nie XB, Liu SJ, Liu J, Bian WH. Curcumol Attenuates Endometriosis by Inhibiting the JAK2/STAT3 Signaling Pathway. *Med Sci Monit* **2022,** *28*, e934914.

31. Takaoka O, Mori T, Ito F, Okimura H, Kataoka H, Tanaka Y, Koshiba A, Kusuki I, Shigehiro S, Amami T, Kitawaki J. Daidzein-rich isoflavone aglycones inhibit cell growth and inflammation in endometriosis. *J Steroid Biochem Mol Biol* **2018,** *181*, 125-132.

32. Woo JH, Ahn JH, Jang DS, Choi JH. Effect of Dehydrocostus Lactone Isolated from the Roots of Aucklandia lappa on the Apoptosis of Endometriotic Cells and the Alternative Activation of Endometriosis-Associated Macrophages. *Am J Chin Med* **2019,** *47* (6), 1289-1305.

33. Park S, Lim W, Song G. Delphinidin induces antiproliferation and apoptosis of endometrial cells by regulating cytosolic calcium levels and mitochondrial membrane potential depolarization. *J Cell Biochem* **2019,** *120* (4), 5072-5084.

34. Park W, Park MY, Song G, Lim W. 5,7-Dimethoxyflavone induces apoptotic cell death in human endometriosis cell lines by activating the endoplasmic reticulum stress pathway. *Phytother Res* **2020,** *34* (9), 2275-2286.

35. Mc Cormack BA, Bilotas MA, Madanes D, Ricci AG, Singla JJ, Barañao RI. Potential use of ellagic acid for endometriosis treatment: its effect on a human endometrial cell cycle, adhesion and migration. *Food Funct* **2020,** *11* (5), 4605-4614.

36. Guan QH, Shi WJ, Zhou LS, Tao AL, Li L. Effect of epigallocatechin-3-gallate on the status of DNA methylation of E-cadherin promoter region on endometriosis mouse. *J Obstet Gynaecol Res* **2020,** *46* (10), 2076-2083.

37. Wei Z, Gu X, Zhang JR, Chen Y, Jiang T, Hu DF, Miao MY, Zhou H, Cheng R, Teichmann AT, Yang YZ. Beneficial biological effects of Flavokawain A, a chalcone constituent from kava, on surgically induced endometriosis rat model. *J Ethnopharmacol* **2024,** *318* (Pt A), 116896.

38. Eisalou MY, Farahpour MR. Effectiveness of Gamma Oryzanol on prevention of surgical induced endometriosis development in rat model. *Sci Rep* **2022,** *12* (1), 2816.

39. Zhang B, Zhou WJ, Gu CJ, Wu K, Yang HL, Mei J, Yu JJ, Hou XF, Sun JS, Xu FY, Li DJ, Jin LP, Li MQ. The ginsenoside PPD exerts anti-endometriosis effects by suppressing estrogen receptor-mediated inhibition of endometrial stromal cell autophagy and NK cell cytotoxicity. *Cell Death Dis* **2018,** *9* (5), 574.

40. Melekoglu R, Ciftci O, Eraslan S, Cetin A, Basak N. The beneficial effects of nerolidol and hesperidin on surgically induced endometriosis in a rat model(). *Gynecol Endocrinol* **2018,** *34* (11), 975-980.

41. Hsu YW, Chen HY, Chiang YF, Chang LC, Lin PH, Hsia SM. The effects of isoliquiritigenin on endometriosis in vivo and in vitro study. *Phytomedicine* **2020,** *77*, 153214.

42. Zhao JD, Wang JT, Liu JX, Li SL, Liu PF, Zhang XD. Effect and mechanisms of kaempferol against endometriosis based on network pharmacology and in vitro experiments. *BMC Complement Med Ther* **2022,** *22* (1), 254.

43. Park S, Lim W, You S, Song G. Ameliorative effects of luteolin against endometriosis progression in vitro and in vivo. *J Nutr Biochem* **2019,** *67*, 161-172.

44. Park S, Song G, Lim W. Myricetin inhibits endometriosis growth through cyclin E1 down-regulation in vitro and in vivo. *J Nutr Biochem* **2020,** *78*, 108328.

45. Kapoor R, Sirohi VK, Gupta K, Dwivedi A. Naringenin ameliorates progression of endometriosis by modulating Nrf2/Keap1/HO1 axis and inducing apoptosis in rats. *J Nutr Biochem* **2019,** *70*, 215-226.

46. Park S, Lim W, Bazer FW, Song G. Naringenin induces mitochondria-mediated apoptosis and endoplasmic reticulum stress by regulating MAPK and AKT signal transduction pathways in endometriosis cells. *Mol Hum Reprod* **2017,** *23* (12), 842-854.

47. Wei X, Shao X. Nobiletin alleviates endometriosis via down-regulating NF-κB activity in endometriosis mouse model. *Biosci Rep* **2018,** *38* (3).

48. Park Y, Cho YJ, Sung N, Park MJ, Guan X, Gibbons WE, O'Malley BW, Han SJ. Oleuropein suppresses endometriosis progression and improves the fertility of mice with endometriosis. *J Biomed Sci* **2022,** *29* (1), 100.

49. Park S, Lim W, Bazer FW, Whang KY, Song G. Quercetin inhibits proliferation of endometriosis regulating cyclin D1 and its target microRNAs in vitro and in vivo. *J Nutr Biochem* **2019,** *63*, 87-100.

50. Khodarahmian M, Amidi F, Moini A, Kashani L, Salahi E, Danaii-Mehrabad S, Nashtaei MS, Mojtahedi MF, Esfandyari S, Sobhani A. A randomized exploratory trial to assess the effects of resveratrol on VEGF and TNF-α 2 expression in endometriosis women. *J Reprod Immunol* **2021,** *143*, 103248.

51. Madanes D, Meresman G, Valla SA, Hassan N, Kiesel L, Greve B, Barañao RI, Götte M, Ricci AG. Resveratrol impairs cellular mechanisms associated with the pathogenesis of endometriosis. *Reprod Biomed Online* **2022,** *44* (6), 976-990.

52. Ding D, Cai X, Zheng H, Guo SW, Liu X. Scutellarin Suppresses Platelet Aggregation and Stalls Lesional Progression in Mouse With Induced Endometriosis. *Reprod Sci* **2019,** *26* (11), 1417-1428.

53. Mirzaei N, Jahanian Sadatmahalleh S, Rouholamin S, Nasiri M. A randomized trial assessing the efficacy of Silymarin on endometrioma-related manifestations. *Sci Rep* **2022,** *12* (1), 17549.

54. Ham J, Kim J, Bazer FW, Lim W, Song G. Silibinin-induced endoplasmic reticulum stress and mitochondrial dysfunction suppress growth of endometriotic lesions. *J Cell Physiol* **2019,** *234* (4), 4327-4341.

55. Huang SH, Xiao FY, Guo SW, Zhang TT. Tetramethylpyrazine Retards the Progression and Fibrogenesis of Endometriosis. *Reprod Sci* **2022,** *29* (4), 1170-1187.

56. Li JJ, Zeng Z, Chang YJ, Li MC, Wu QL, Chen P, Liang XY. Suppressive Effects of Ursolic Acid on Human Endometriotic Stromal Cells Survival. *Gynecol Obstet Invest* **2020,** *85* (1), 72-81.
